# Supplementary material
Source: publisher figshare collection journal article supplement (https://acs.figshare.com/ndownloader/files/4665925)
Supplement: Supplementary file 1 [file 4665925]

## Supporting Information

### Three-dimensional Mesoporous-Giantporeous Inorganic/organic Composite Scaffolds for Tissue Engineering

By Hui-suk Yun,\* Seong-eon Kim, Young-teak Hyeon, Su-jin Hoe, Jung-wook Shin

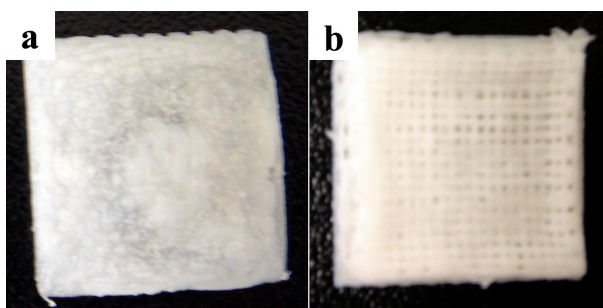

**SI 1.** PCL scaffolds fabricated by a robotic deposition with a plotting medium (a) and a heat-treated blowing system (b).

#### **SI 2.** Experimental details

*Synthesis of gel paste:* MBG with 3D cubic pore structure were prepared using tetraethyl orthosilicate (TEOS), triethyl phosphate (TEP), and calcium nitrate tetrahydrate (CaNT) as inorganic precursors, and a triblock copolymer, poly(ethylene oxide)-poly(propylene oxide)-poly(ethylene oxide) (Pluronic F127,  $\text{EO}_{100}\text{PO}_{65}\text{EO}_{100}$ ,  $M_{\text{ave}} = 12600$ ), as the meso-structure-directing agent through an evaporation-induced self-assembly process. In a typical synthesis, 2.88 g of F127 is dissolved in 18.1 ml of ethanol (EtOH). Stock solutions, which were prepared by mixing 1.36 g of CaNT, 0.26 ml of TEP, 6 ml of TEOS, 0.95 ml of HCl (1M), 7.62 ml of EtOH and 2.86 ml of  $\text{H}_2\text{O}$ , were added to this solution after stirring them separately for 1h, and were vigorously stirred together for another 4h at 40 °C. The molar composition was TEOS: CaNT: TEP: F127=1: 0.2: 0.05: 0.008 in this case. The reactant solution was transferred to a polystyrene vessel without a cap, and aged at 40 °C, 40 RH% for 48h without stirring. Gel films were obtained on evaporating the solvent. These gel films were easily separated from the vessel after aging and were calcined at 600 °C for 6h in air to remove the template. The calcined MBGs were then ground and sieved. Granules with size in below 25  $\mu\text{m}$  were selected. PCL was dissolved in chloroform at 40 °C and the determined amounts of MBG powders (from 0 to 80 wt. % of MBG to PCL) were then mixed with this to produce homogeneous PCL/MBG paste.

*Robotic deposition of scaffolds:* Scaffolds were fabricated by directly extruding the paste gel onto a chilled substrate using a robotic deposition device. A gantry robotic deposition apparatus was used with specially-altered systems such as an actuator to control the position of deposition nozzle for scaffold fabrication and a heat-controlled blowing system to maintain 3D scaffold morphology followed by the rapid solvent evaporation. Three axes of motion control (x, y, and z-axis) were provided by the gantry system, and a material delivery assembly composed of a syringe as a reservoir was affixed on the z-axis motion stage. The z-axis motion stage assembly was mounted on a moving x gantry to enable controlled motion of the mounted syringe in three dimensions. The gel paste housed in the syringe was deposited through a cylindrical nozzle (17~26 gauge (G), 24 G ( $\approx 500 \mu\text{m}$ ) is generally used). A linear actuator served to depress the plunger of the syringe at a fixed speed such that the volumetric flow rate could be precisely controlled. The extruding strength and speed is controlled 200~250  $\mu\text{l/min}$  and 5~10 mm/sec, respectively, depending on the viscosity of gel paste. The gel paste extruded onto chilled substrate (5~10  $^{\circ}\text{C}$ ) to the fast condensation followed by the solidification of PCL. The shapes and sizes of scaffold can be designed at discretion and can be controlled by computer system.

*In Vitro bioactivity:* The assessment of the in vitro bioactivity of the hierarchically porous scaffolds was carried out in SBF at 37  $^{\circ}\text{C}$ . The scaffold was immersed in SBF after washing with EtOH and drying. SBF contained 142.0 mM  $\text{Na}^{+}$ , 5 mM  $\text{K}^{+}$ , 1.5 mM  $\text{Mg}^{2+}$ , 2.5 mM  $\text{Ca}^{2+}$ , 147.8 mM  $\text{HCl}$ , 4.2 mM  $\text{HCO}_3^{-}$ , 1.0 mM  $\text{HPO}_4^{2-}$ , and 0.5 mM  $\text{SO}_4^{2-}$ . Its chemical composition was similar to that of human plasma. The solution had a pH of 7.4 and was kept at 37  $^{\circ}\text{C}$  before use.

*In vitro biocompatibility test:* The fabricated 3D scaffolds were repeatedly washed with EtOH and freeze dried to remove extra remained chloroform before cell seeding. Human osteoblast-like cells, MG63, were seeded onto square-shaped specimens (height = 8 mm, width = 8 mm, depth = 3 mm) at a density of  $5 \times 10^5$  cells/ml and cultured with Dulbecco's Modified Eagle Medium, 10 % fetal bovine serum (FBS), and 1 % Penicillin/Streptomycin. The cell culture was maintained in a gas-jacket incubator equilibrated with 5 %  $\text{CO}_2$  gas at 37  $^{\circ}\text{C}$ . The cell viability and proliferation were determined using the MTT assay. The absorbance of the formazan produced by the cells was measured at 570 nm with a micro-plate reader (ELISA). 5 specimens were examined for each sample.

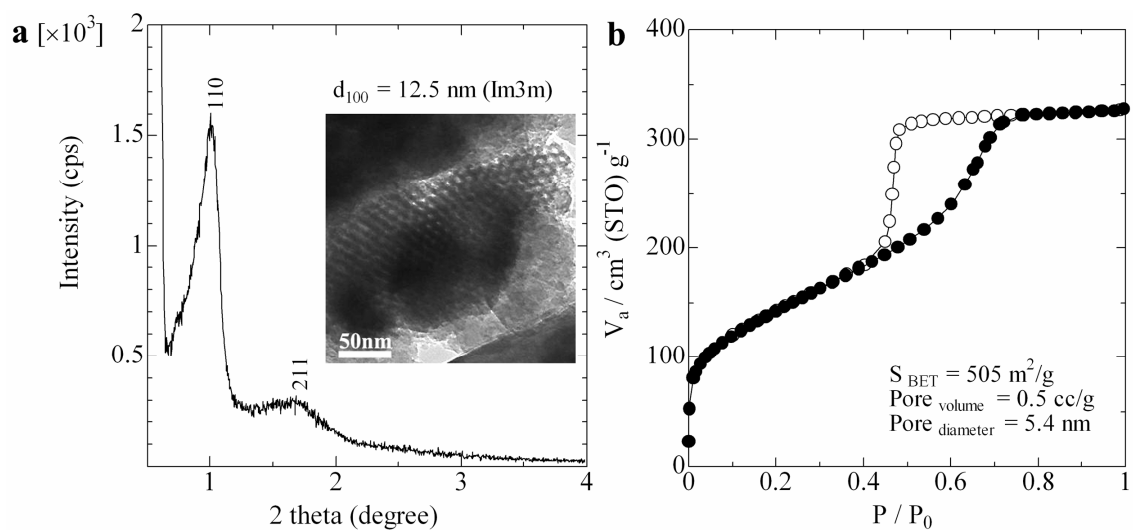

SI 3. XRD pattern, TEM image, and  $N_2$  adsorption-desorption isotherms of MBG, templating by F127.

### PCL/MBG

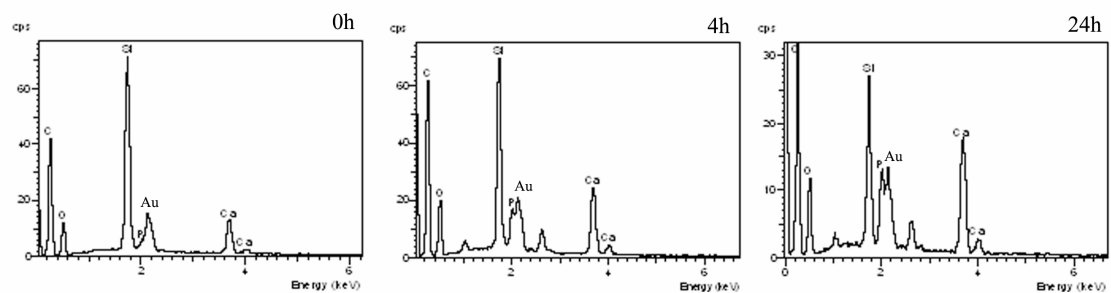

### PCL

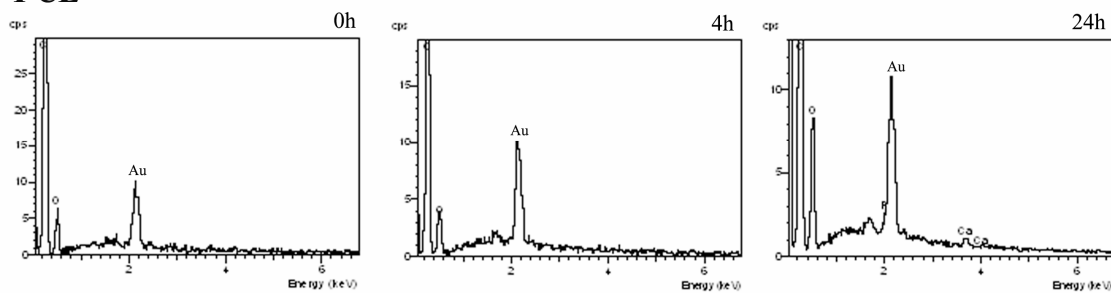

SI 4. EDX results of PCL and PCL/MBG composite scaffolds after immersing them in SBF (Au was coated to FE-SEM observation).
